# Supplementary material
Source: ML conference proceedings conference paper supplement (https://openaccess.thecvf.com/content/ICCV2021/html/Huang_Attack-Guided_Perceptual_Data_ICCV_2021_paper.html)
Supplement: Supplementary file 1 [file Huang_Attack-Guided_Perceptual_Data_ICCV_2021_supplemental.pdf]

## Appendix

In this supplementary material, Section A gives more implementation details about architecture and optimization. Section B presents more results on different types of low-level perceptual variations. Section C studies the contribution of each component in our approach. Section D analyzes the influence of hyper-parameters. Section E provides the unsupervised version of  $L_{reg}$  and the mathematical derivation of  $L_w$ .

### A. More Implementation Details

The **network architectures** of content encoder  $E_c$  and degradation encoder  $E_d$  are respectively given in Table 1 and Table 2, while the structure of degradation attacker  $A_d$  is illustrated in Figure 1. The network implementation of the generator  $G$  and the discriminator  $D$  follows [46]. Note that the architecture of content encoder  $E_c$  is similar to the structure encoder in [46] without using 1-channel inputs.

The **optimization process** of our proposed approach is described in Algorithm 1.

#### Algorithm 1 Attack-Guided Perceptual Data Generation.

- 1: **Train** the disentangled generative model which consist of  $E_c$ ,  $E_d$  and  $G$ .
- 2: **Estimate** the real-world degradation distribution  $\mathcal{D}_d$ .
- 3: **Train** the degradation attacker  $A_d$  when the generative model is fixed.
- 4: **For** each sample  $I$  **from** the training set **do**:
- 5:     **a.** Produce  $N_s$  augmented samples  $I'$  based on  $\mathcal{D}_d$ ;
- 6:     **a.** Produce an adversarial sample  $I''$  based on  $A_d$ ;
- 7:     **c.** Extract identity features of all samples;
- 8:     **d.** Compute losses  $L_{cls}$ ,  $L_{sc}$  and  $L_w$ ;
- 9:     **e.** Update identity encoder  $E_{id}$ .

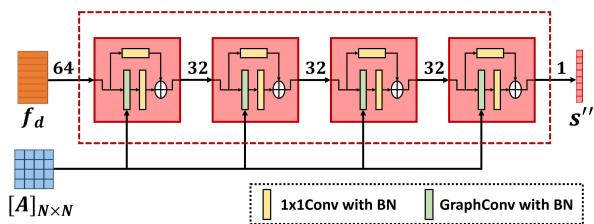

Figure 1. The network structure of the degradation attacker  $A_d$ . All activation functions (**Tanh** for the last layer and **ReLU** for the rest) are not shown for simplification.

### B. More Types of Perceptual Variations

As shown in Table 3, we provide more results with new types of low-level variations based on synthetic low-quality

| Layer     | Parameters                                                                                  | Output Size               |
|-----------|---------------------------------------------------------------------------------------------|---------------------------|
| Input     | -                                                                                           | $3 \times 256 \times 128$ |
| Conv1     | $[3 \times 3, 16]$                                                                          | $16 \times 128 \times 64$ |
| Conv2     | $[3 \times 3, 32]$                                                                          | $32 \times 128 \times 64$ |
| Conv3     | $[3 \times 3, 32]$                                                                          | $32 \times 128 \times 64$ |
| Conv4     | $[3 \times 3, 64]$                                                                          | $64 \times 64 \times 32$  |
| ResBlocks | $\begin{bmatrix} 3 \times 3, 64 \\ 3 \times 3, 64 \end{bmatrix} \times 4$                   | $64 \times 64 \times 32$  |
| ASPP      | $\begin{bmatrix} 1 \times 1, 32 \\ 1 \times 1, 32 \\ 3 \times 3, 32 \end{bmatrix} \times 3$ | $128 \times 64 \times 32$ |
| Conv5     | $[1 \times 1, 128]$                                                                         | $128 \times 64 \times 32$ |

Table 1. Architecture of the content encoder  $E_c$ .

| Layer   | Parameters         | Output Size               |
|---------|--------------------|---------------------------|
| Input   | -                  | $3 \times 256 \times 128$ |
| Conv1   | $[3 \times 3, 16]$ | $16 \times 128 \times 64$ |
| Conv2   | $[3 \times 3, 16]$ | $16 \times 128 \times 64$ |
| Conv3   | $[3 \times 3, 32]$ | $32 \times 64 \times 32$  |
| Conv4   | $[3 \times 3, 64]$ | $64 \times 32 \times 16$  |
| Conv5   | $[3 \times 3, 64]$ | $64 \times 16 \times 8$   |
| Conv6   | $[3 \times 3, 64]$ | $64 \times 8 \times 4$    |
| AvgPool | -                  | $64 \times 1 \times 1$    |

Table 2. Architecture of the degradation encoder  $E_d$ .

Market-1501 datasets. Our proposed method is able to consistently improve the baseline performance against different types of low-level perceptual variations. In fact, if we assume that each variation is independent of each other, our method can further handle the entangled case, e.g., *Res. + Illu.*, by defining a hybrid degraded function which is used to synthesize normal-degraded image pairs.

### C. More Ablation Studies

To study the contribution of each component in our approach, we further conduct comprehensive ablation analysis on the MLR-CUHK03 and MLR-VIPeR datasets, as reported in Table 4. The ‘w/o *hard*’ configuration denotes that the *max* operation (i.e., hard sample mining) in the self-center loss is replaced by an *average* operation.

It can be observed that all the components consistently result in improvements, where the self-center loss achieves the most significant performance gains, e.g., 7.2% and 14.0% at Rank-1 on the MLR-CUHK03 and MLR-VIPeR dataset, respectively. This is because the self-center loss di-

rectly leverages augmented samples to regularize the feature manifold, resulting in robust identity representation learning.

### D. Hyper-parameter Analysis

Here we show how the hyper-parameter  $N_s$  affects the Re-ID performance, as illustrated in Figure 2. It can be observed that the Rank-1 scores on the three datasets can be consistently improved with the increase of  $N_s$  at first, and then reaches a steady state with slight fluctuations. We also find that even with a small  $N_s$ , satisfactory results can be achieved. This improvement benefits from the hard sample mining for self-center loss as well as perceptual resampling based on the estimated real-world degradation distribution. The other hyper-parameters, such as balancing weights  $\lambda_{sc}$

| Method   | Low-level Variation Types |        |       |            |
|----------|---------------------------|--------|-------|------------|
|          | Noise                     | Motion | Illu. | Res.+Illu. |
| Baseline | 74.2                      | 68.0   | 73.0  | 63.6       |
| Ours     | 79.7                      | 76.8   | 80.3  | 70.9       |

Table 3. Rank-1 score (%) on low-quality Market-1501 datasets, where *Res.* denotes resolution and *Illu.* denotes illumination.

| Method              | MLR-CUHK03  |             | MLR-VIPeR   |             |
|---------------------|-------------|-------------|-------------|-------------|
|                     | Rank-1      | Rank-5      | Rank-1      | Rank-5      |
| w/o $L_{adv}^{tri}$ | 83.3        | 95.1        | 50.3        | 76.6        |
| w/o $L_{adv}^{att}$ | 80.8        | 95.4        | 48.4        | 76.9        |
| w/o <i>hard</i>     | 85.5        | 96.9        | 51.3        | 77.8        |
| w/o $L_{sc}$        | 80.4        | 93.5        | 38.2        | 67.8        |
| w/o $L_w$           | 86.1        | 97.1        | 48.5        | 78.1        |
| Ours                | <b>87.6</b> | <b>97.5</b> | <b>52.2</b> | <b>79.7</b> |

Table 4. Ablation analysis on the MLR-CUHK03 and MLR-VIPeR datasets.

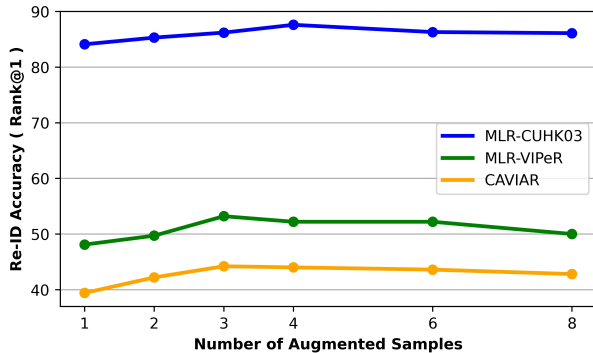

Figure 2. Analysis of the hyper-parameter  $N_s$  which controls the number of augmented samples for each input sample.

and  $\lambda_w$ , are determined by grid search on the val set of the MLR-CUHK03 dataset.

### E. Details of Loss Functions

The supervised **score regression loss**  $L_{reg}$  requires the domain division (*e.g.*, LR/HR) of training data to provide labels. For MSMT17 dataset, however, no such a domain division can be used, hence we further introduce an unsupervised score regression loss based on degradation ranking and pseudo-labels.

Considering an input image pair  $(I, I^{de})$ , where  $I^{de}$  is the degraded version of  $I$  produced by a non-differentiable degraded function, their corresponding perceptual quality scores  $(s, s^{de})$  should satisfy  $s > s^{de}$ , which leads to a score ranking loss:

$$L_{reg}^{rank} = \max(-1 \times (s - s^{de}) + \Delta_s, 0), \quad (1)$$

where  $\Delta_s$  is set to 1.0 empirically.

In order to make full use of the non-synthetic images  $I$ , pseudo-labels are assigned so that the supervised MSE regression loss is available:

$$L_{reg}^{mse} = \|s - s^{pse}\|_2, \quad (2)$$

where the estimated pseudo-labels:

$$s^{pse} = \begin{cases} 1, & s \geq 0 \\ -1, & s < 0 \end{cases}. \quad (3)$$

As a result, the unsupervised score regression loss can be defined as:

$$L_{reg} = \lambda_{reg}^{rank} L_{reg}^{rank} + \lambda_{reg}^{mse} L_{reg}^{mse}, \quad (4)$$

where  $\lambda_{reg}^{rank}$  is set to 1.0, while  $\lambda_{reg}^{mse}$  is initialized to 0 then linearly increases to 1.0 for training stability.

The **Wasserstein loss**  $L_w$ . Given identity embeddings  $\tilde{e} \sim \mathcal{N}(\mu, \Sigma)$  and  $\tilde{e}^* \sim \mathcal{N}(\mu^*, \Sigma^*)$ , we employ the standard 2-Wasserstein distance to measure the similarity of these two Gaussian distributions:

$$W_2(\tilde{e}, \tilde{e}^*)^2 = \|\mu - \mu^*\|_2^2 + \text{trace}(\Sigma + \Sigma^* - 2(\Sigma^{\frac{1}{2}} \Sigma^* \Sigma^{\frac{1}{2}})^{\frac{1}{2}}). \quad (5)$$

Assuming that  $\Sigma \Sigma^* = \Sigma^* \Sigma$ , it can be further simplified and derive the Wasserstein loss we used:

$$L_w \triangleq W_2(\tilde{e}, \tilde{e}^*)^2 = \|\mu - \mu^*\|_2^2 + \|\Sigma^{\frac{1}{2}} - \Sigma^{*\frac{1}{2}}\|_F^2. \quad (6)$$
